# Supplementary material for: Thermally activated static friction explains earthquakes interactions
Source: Research Square preprint supplement (doi:10.21203/rs.3.rs-5550111/v1), 2024-12-23
Supplement: Supplementary file 1 [file 646260a28e1665066509507f.pdf]

Supplementary Information for

**Thermally activated static friction explains earthquakes interactions**

Jérôme Weiss,\* David Marsan

\*Corresponding author. Email: [jerome.weiss@univ-grenoble-alpes.fr](mailto:jerome.weiss@univ-grenoble-alpes.fr)

**This PDF file includes:**

Figs. S1 to S4

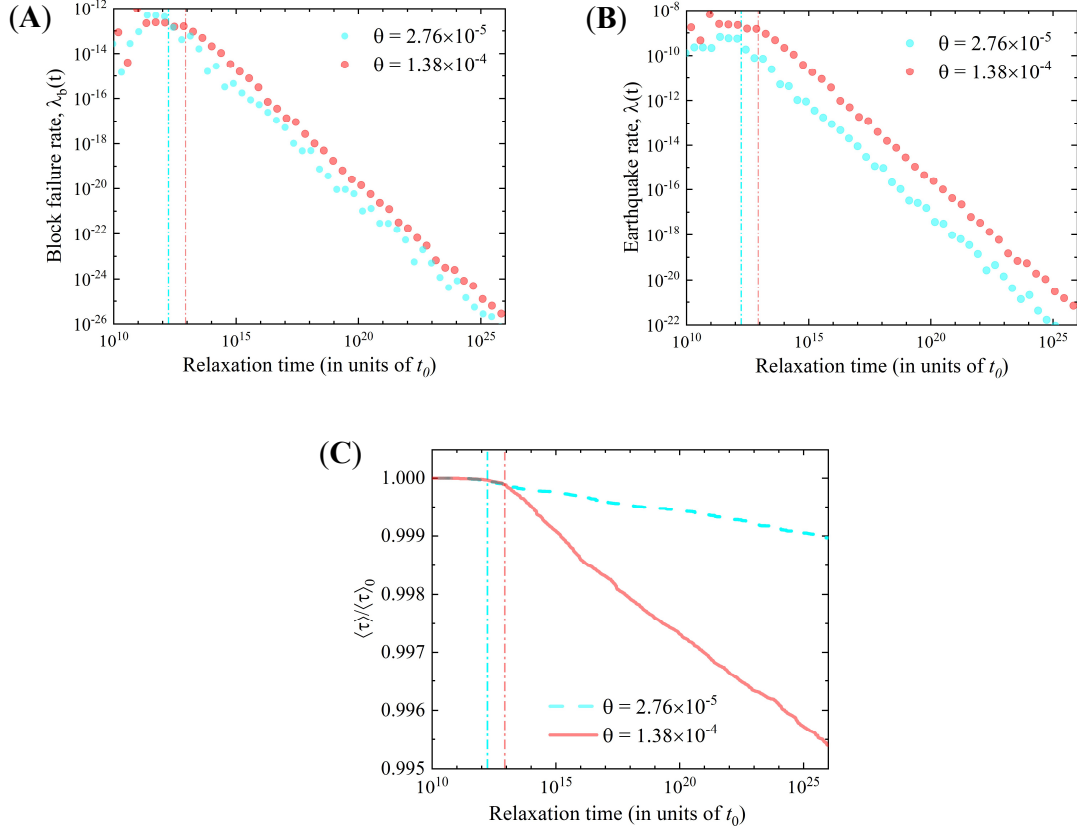

**Fig. S1. Relaxation.** (A) Block slipping rate  $\lambda_b(t)$ , (B) earthquake rate  $\lambda(t)$ , and (C) stress relaxation of the average shear stress  $\langle \tau \rangle$  over the domain during relaxation tests performed at two different temperatures  $\theta$  but a same dissipation  $d=4 \times 10^{-5}$ , for which the sliding has been stopped. The value of  $\langle \tau \rangle$  has been normalized by its value at sliding arrest,  $\langle \tau \rangle_0$ . The vertical dashed-dotted lines represent the value of the time constant  $c = \frac{\theta}{|\dot{\chi}|}$ , as predicted from the Fokker-Planck theoretical description (eq. (9)), for the two temperatures.

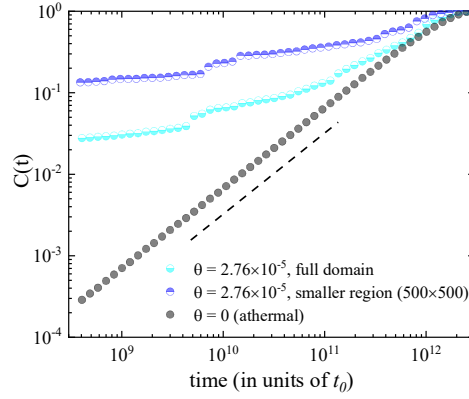

**Fig. S2. Intermittency (time clustering) of earthquake activity.** Intermittency of earthquake activity quantified from a correlation integral analysis of earthquake time series.  $C(t) = 2N_p / (N_e - 1)N_e$ , where  $N_p$  is the number of pairs of events which are separated in time by less than  $t$ , and  $N_e$  the number of successive events in the catalog. Cyan symbols: analysis performed for the events shown on Figure 3, over the full domain ( $2000 \times 2000$ ). Blue symbols: same as cyan symbols, but for earthquakes occurring over a smaller region ( $500 \times 500$ ). Gray symbols: for the events shown on Figure 1 for an athermal simulation. The black dashed line indicates a scaling  $C(t) \sim t$  corresponding to an absence of intermittency (Poisson process), observed for the athermal model.

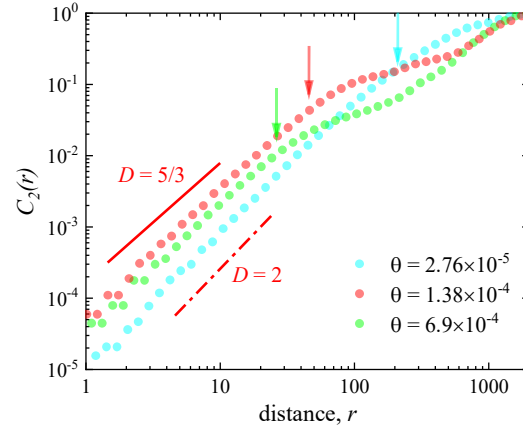

**Fig. S3. Effect of temperature on spatial organization and correlation length.** Correlation integral  $C_2(r) = 2N_p / (N_e - 1)N_e$ , where  $N_p$  is the number of pairs of events whose epicenter separation is less than  $r$ , and  $N_e$  the number of considered successive events, for a fixed time span  $\Delta t = 3 \times 10^{11} t_0$  and a same dissipation  $d = 4 \times 10^{-5}$ , but different temperatures  $\theta$ . This shows that earthquake epicenters are organized following a fractal pattern up to a correlation length  $\xi$  (indicated by vertical arrows) that grows with decreasing temperature.

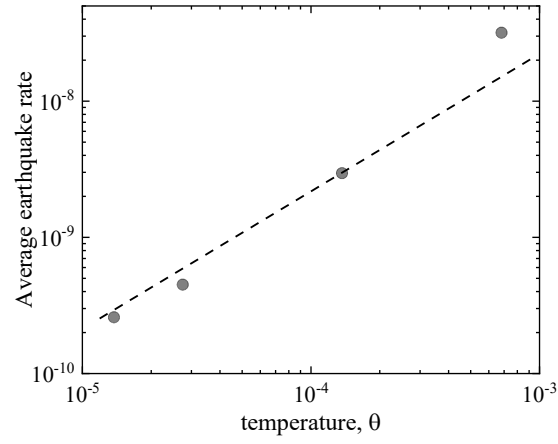

**Fig. S4. Dependence of the average earthquake rate on temperature.** Evolution of the average earthquake rate, i.e. including background activity as well as aftershocks, for simulations performed with the same dissipation  $d=4 \times 10^{-5}$  but different temperatures  $\theta$ . The dashed line indicates a proportional scaling,  $\lambda \sim \theta$ .
